# Supplementary material for: Bi‐allelic pathogenic variants in NDUFC2 cause early‐onset Leigh syndrome and stalled biogenesis of complex I
Source: PubMed Central journal article supplement (PMC7645371; doi:10.15252/emmm.202012619), 2020-09-24

# Figure 3A

## NDUFC2 panel

Chemiluminescent signal used in figure

Colourimetric image to show MW marker (kDa)

S1 S3 C1 C2 C3

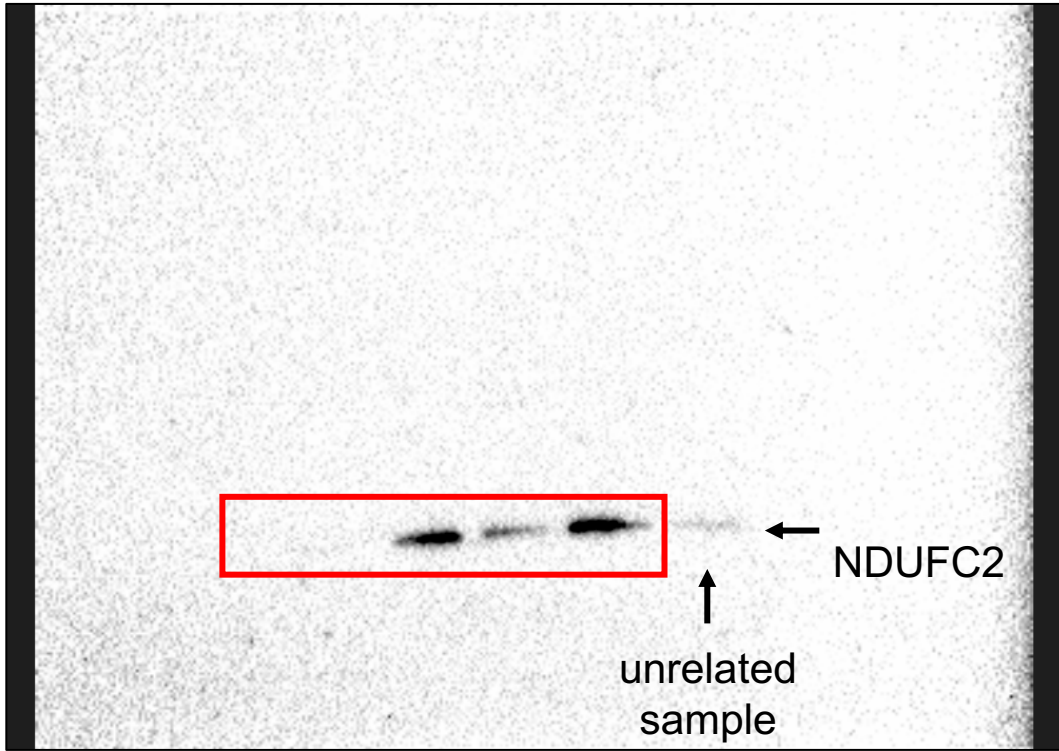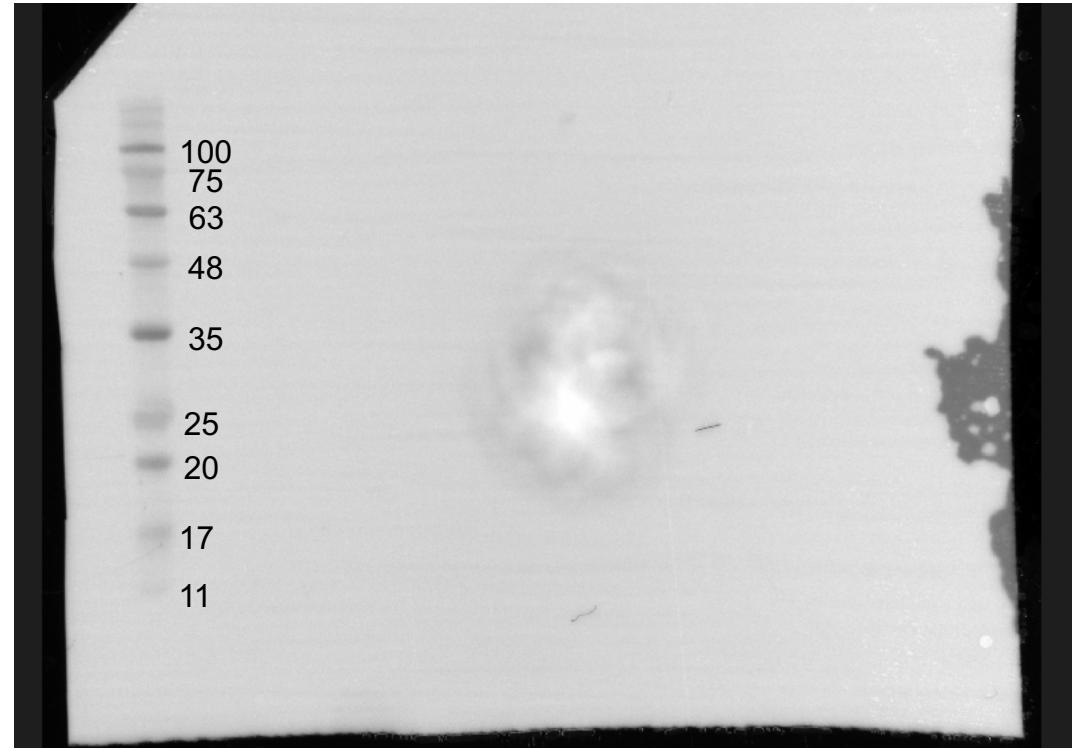

Anti-NDUFC2

Merged image

S1 S3 C1 C2 C3

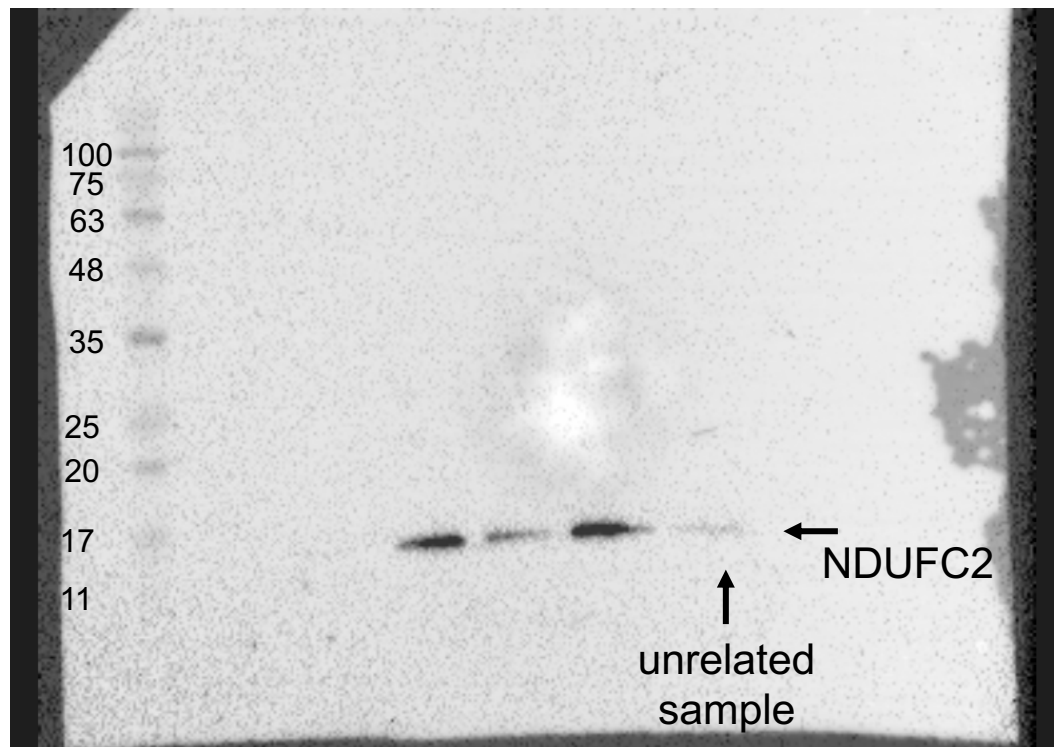

# Figure 3A continued

## NDUFA9 panel

Chemiluminescent signal used in figure

Colourimetric image to show MW marker (kDa)

S1 S3 C1 C2 C3

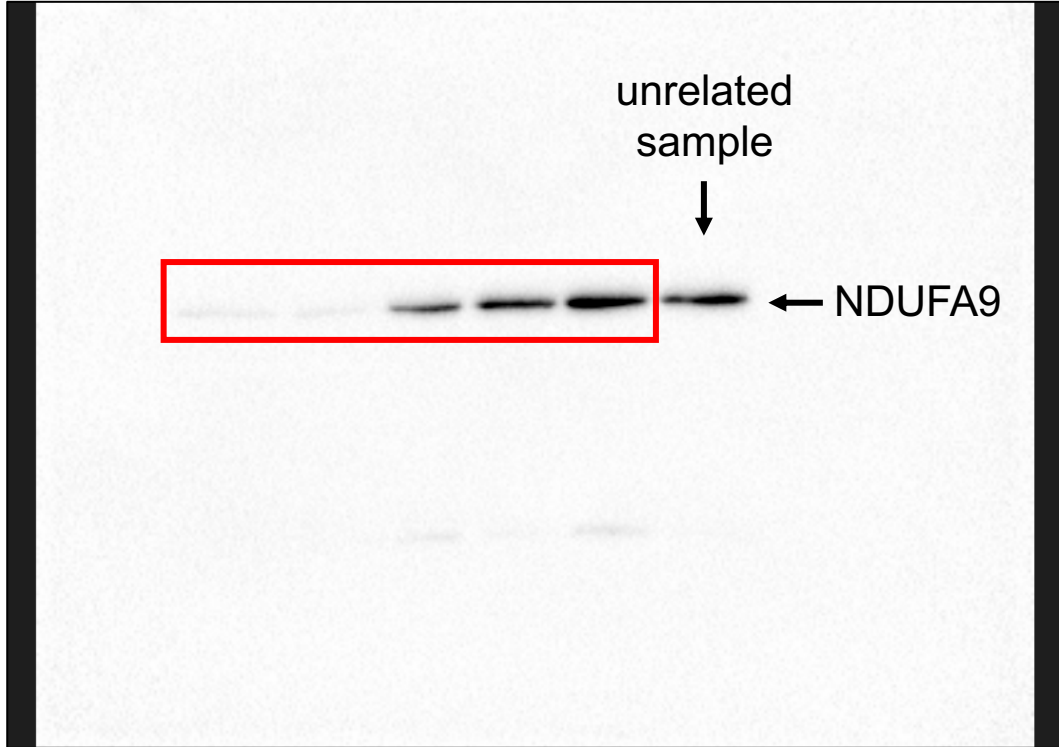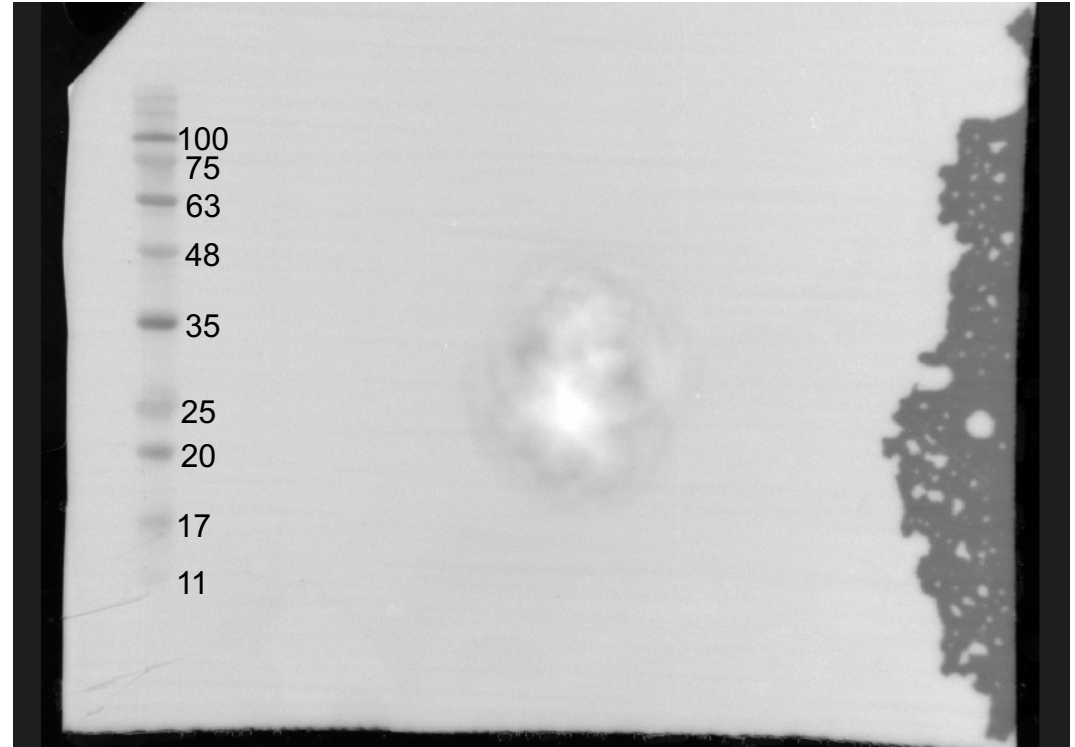

Merged image

S1 S3 C1 C2 C3

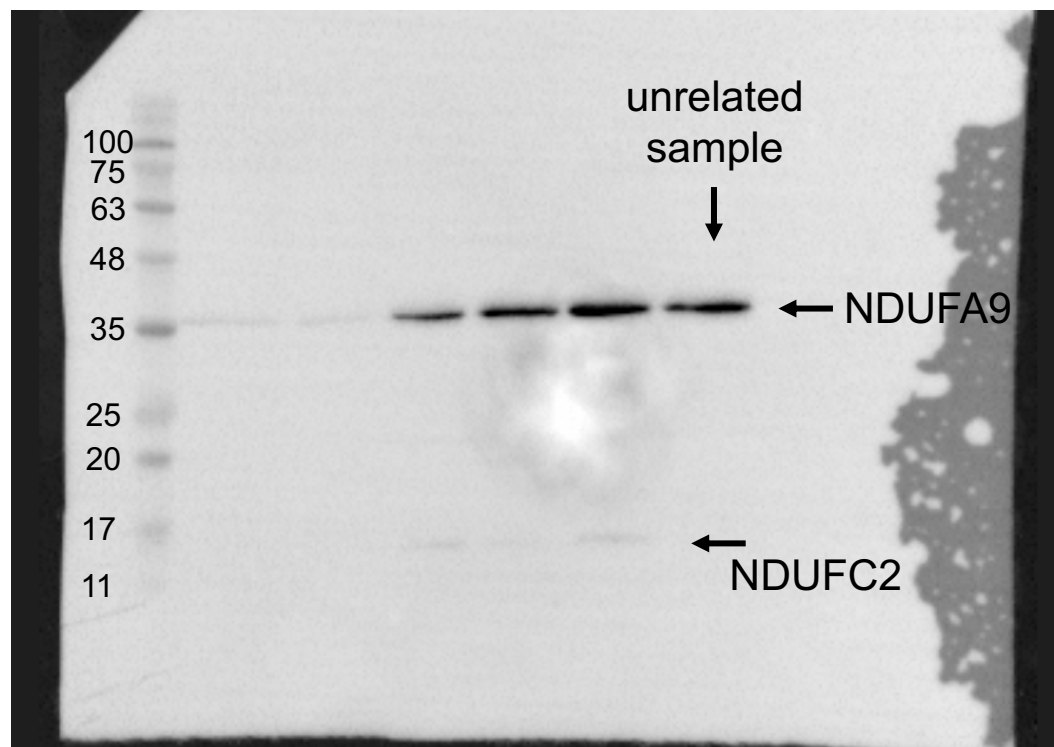



# Figure 3A continued

## NDUFV1 panel

Chemiluminescent signal used in figure

Colourimetric image to show MW marker (kDa)

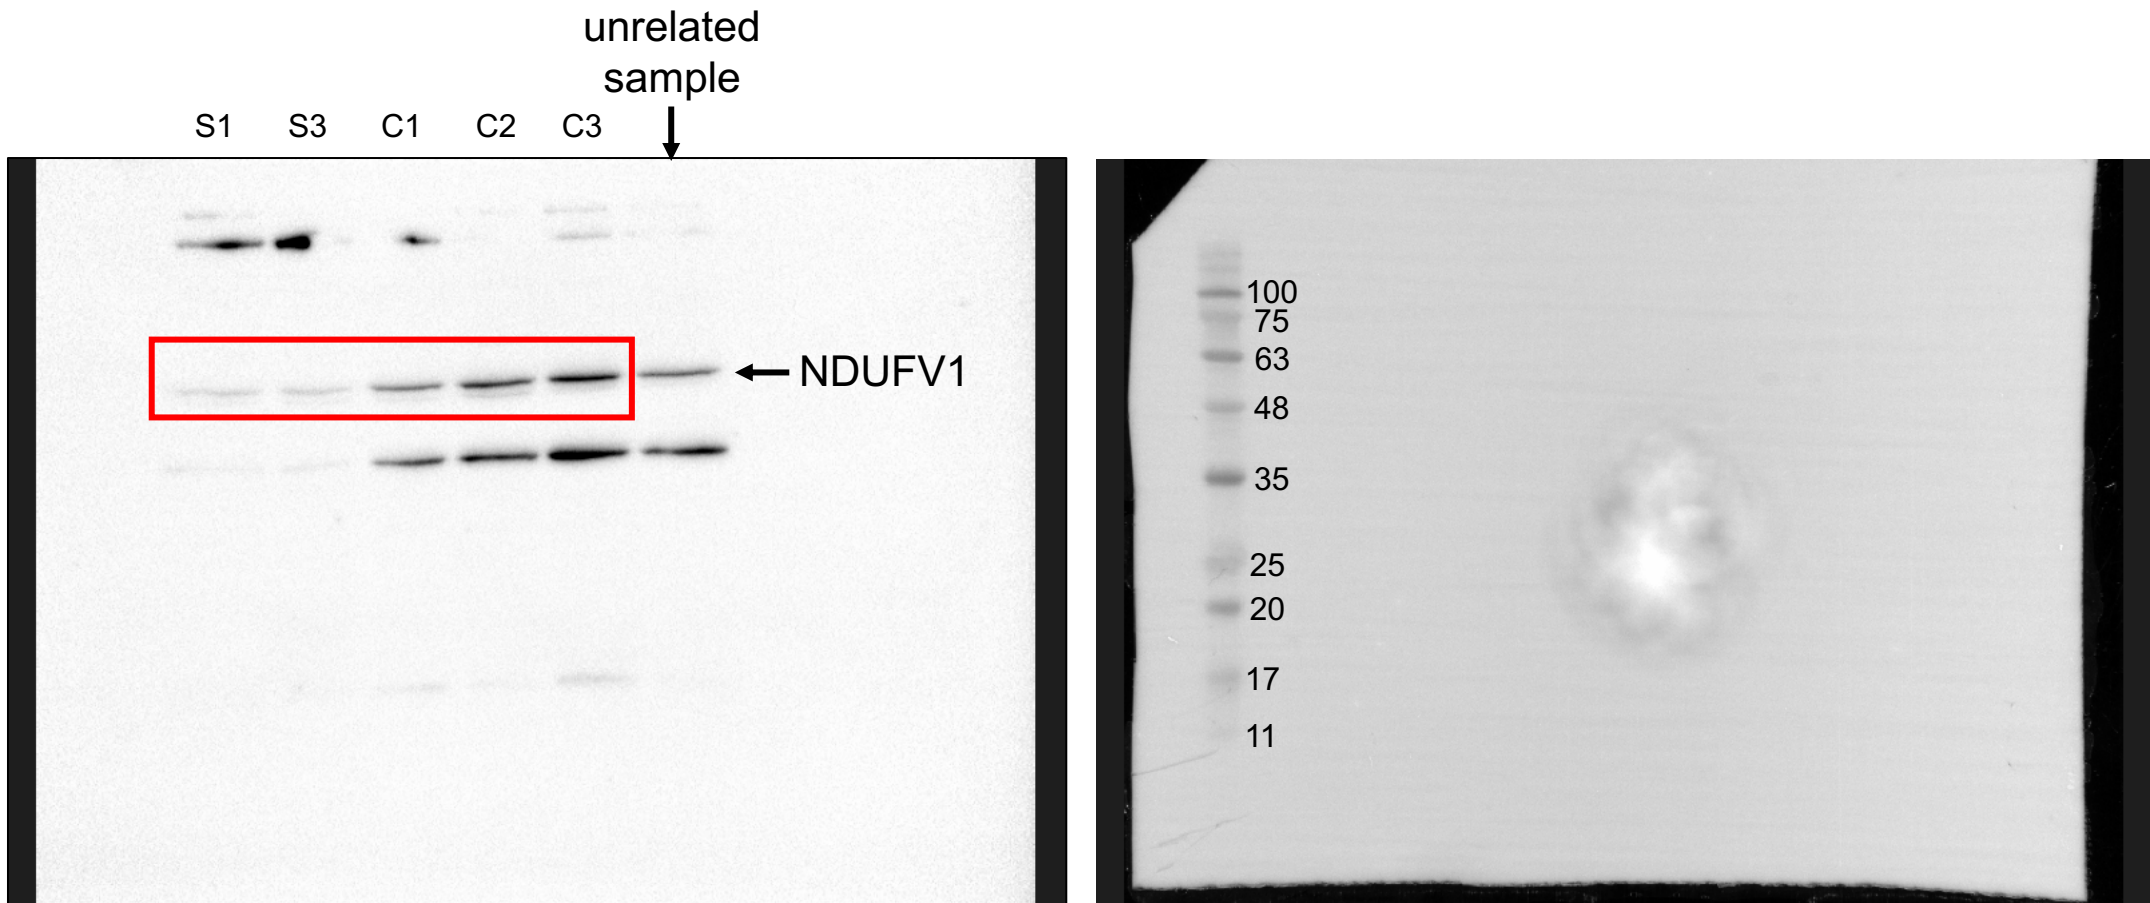

Merged image

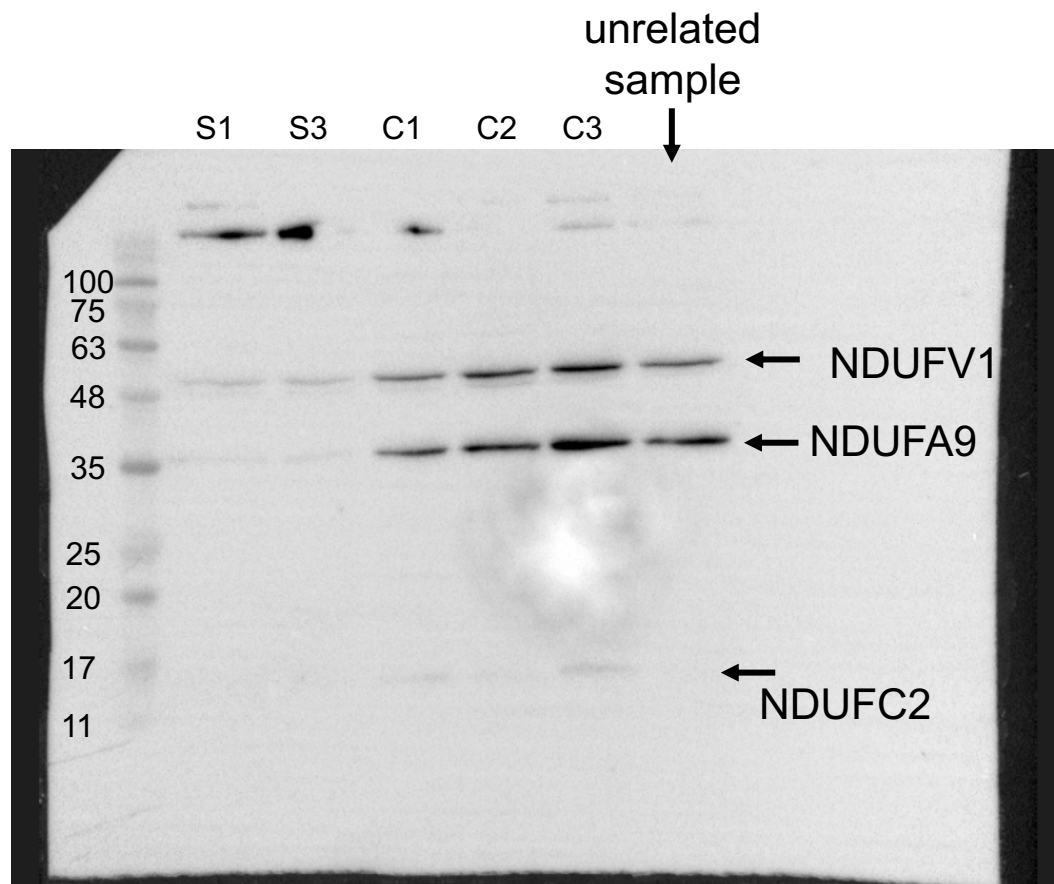

# Figure 3A continued

## SDHA panel

Chemiluminescent signal used in figure

Colourimetric image to show MW marker (kDa)

S1 S3 C1 C2 C3 ↓ unrelated sample

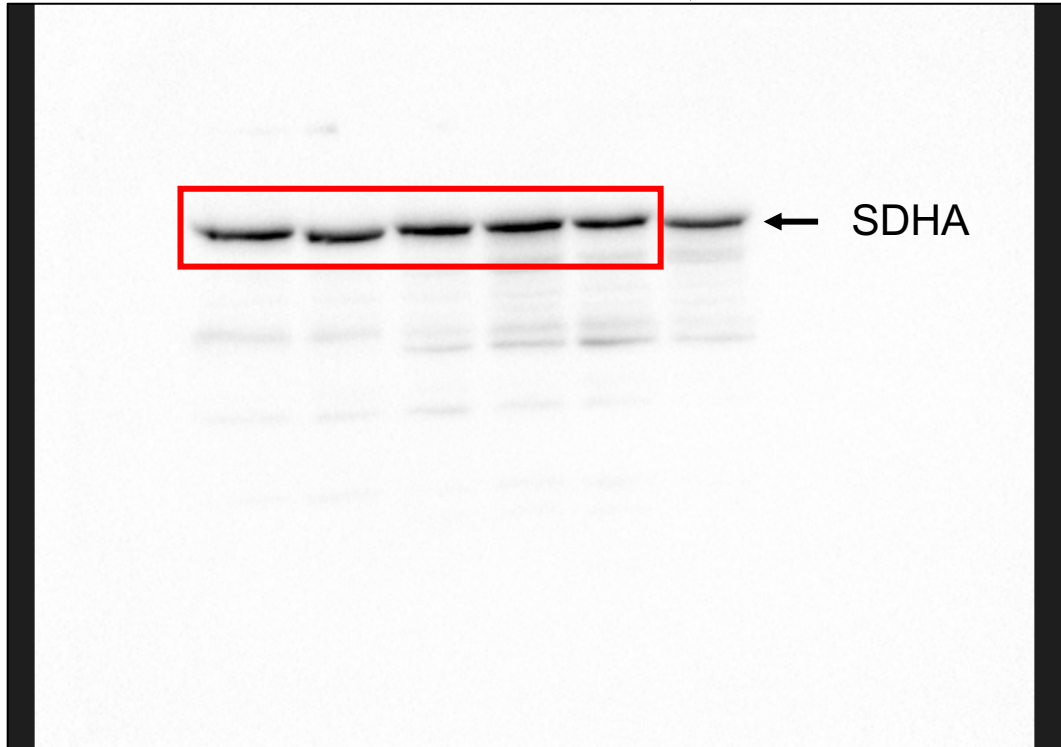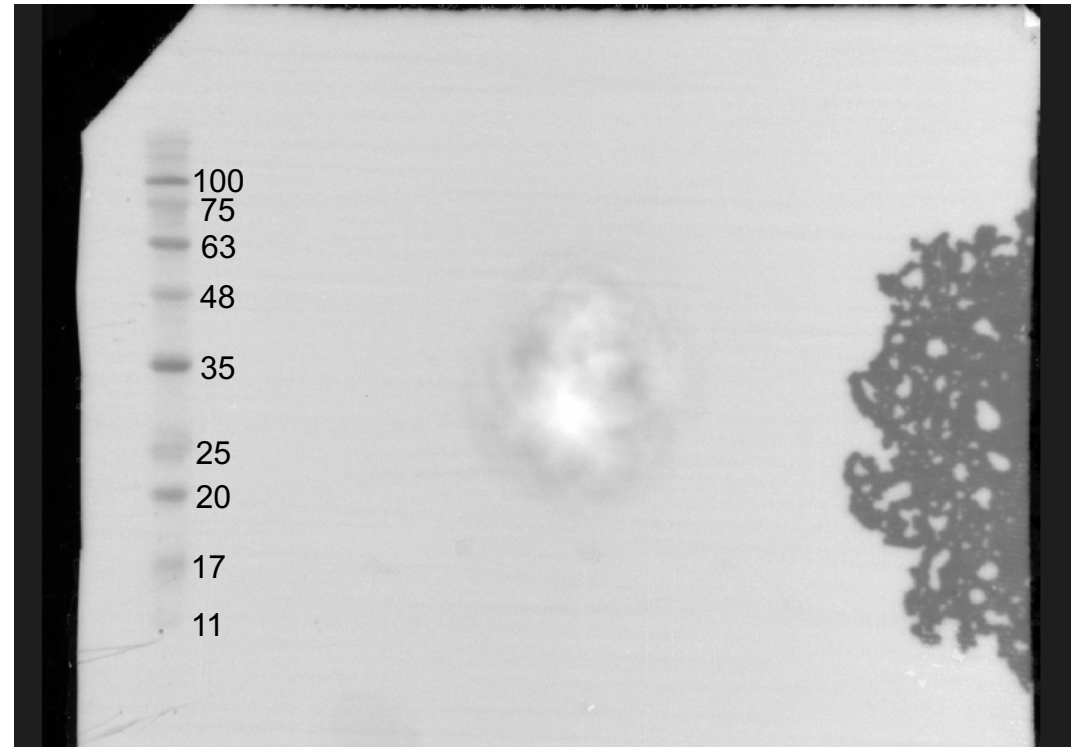

Merged image

S1 S3 C1 C2 C3 ↓ unrelated sample

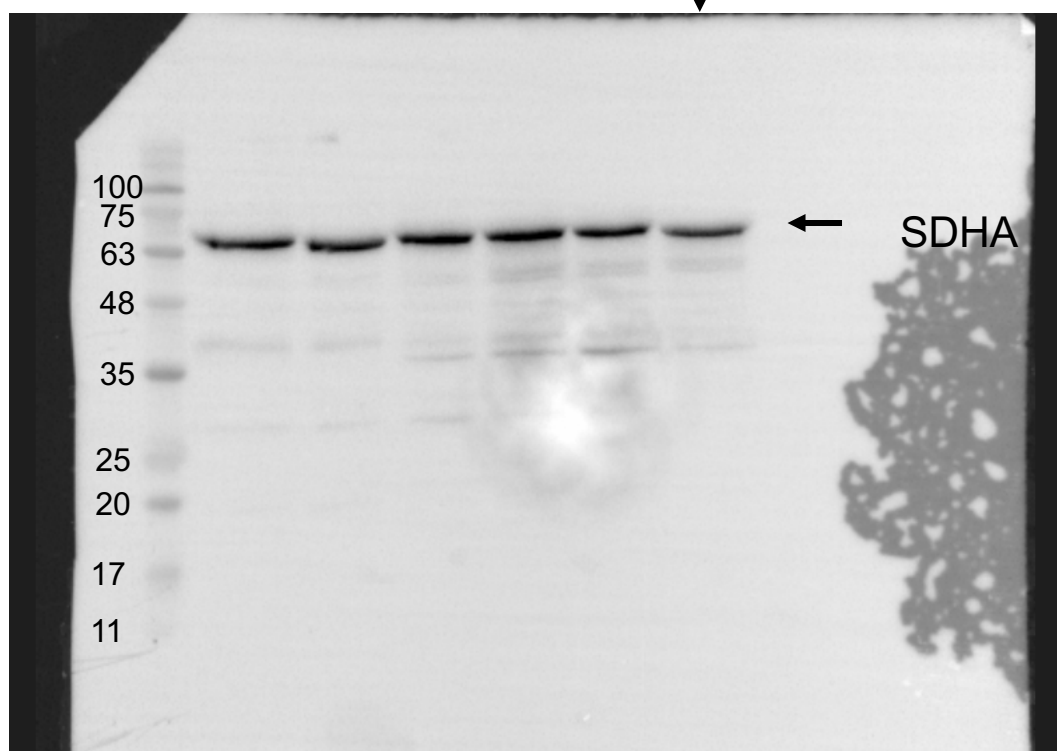



# Figure 3A continued

## NDUFB8 panel

Chemiluminescent signal used in figure

Colourimetric image to show MW marker (kDa)

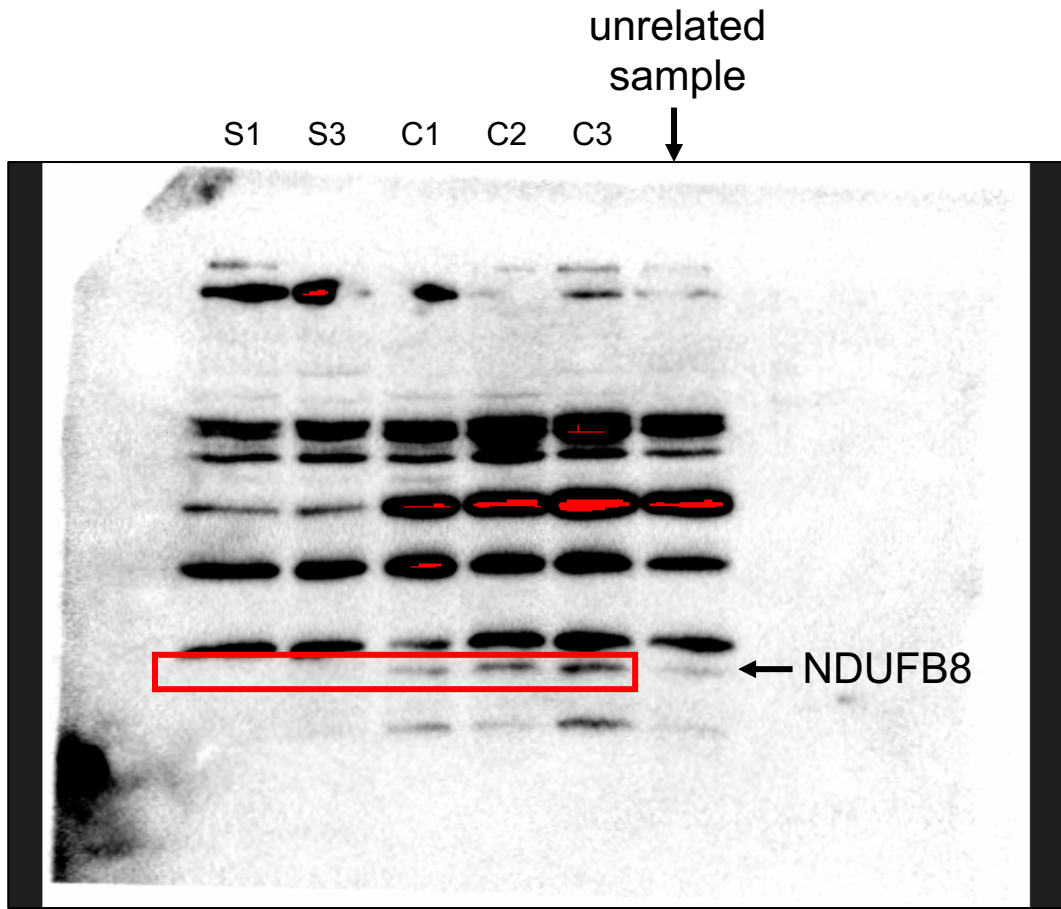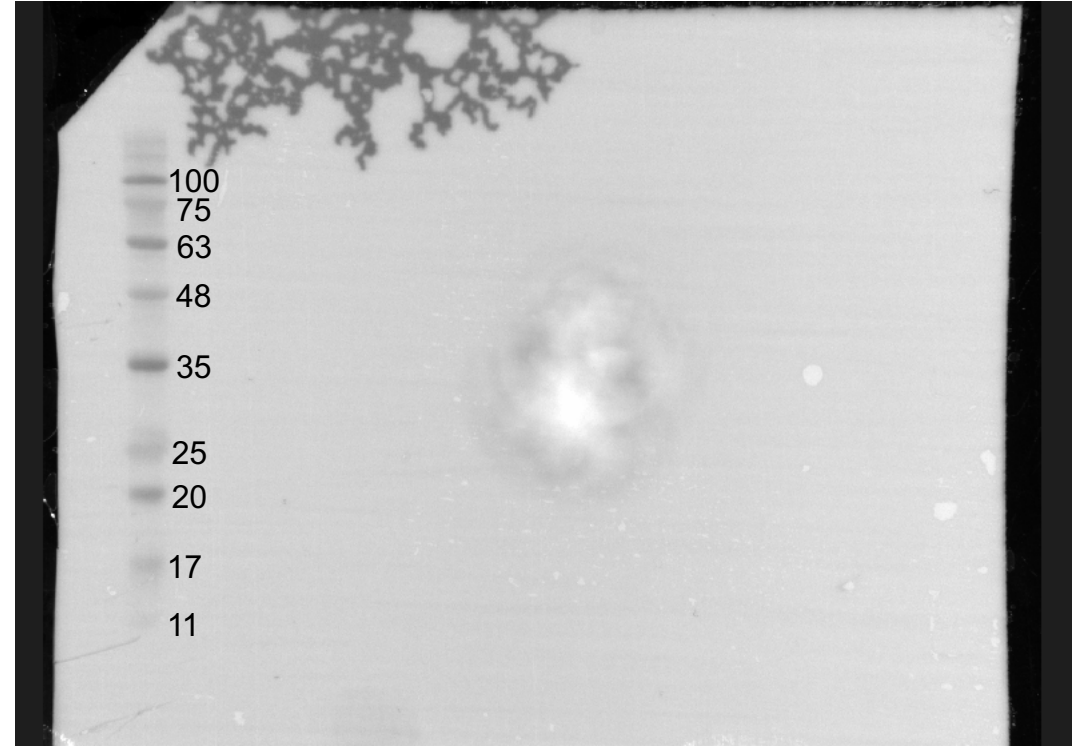

Merged image

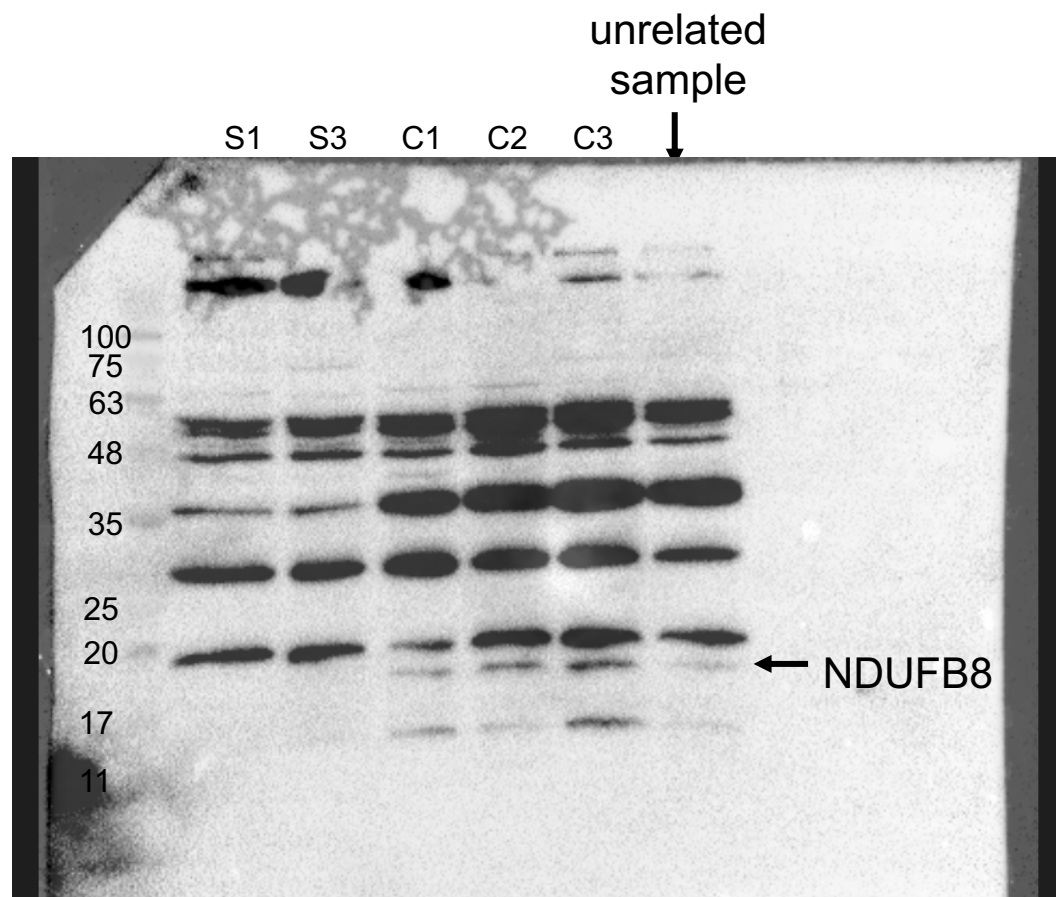

# Figure 3B

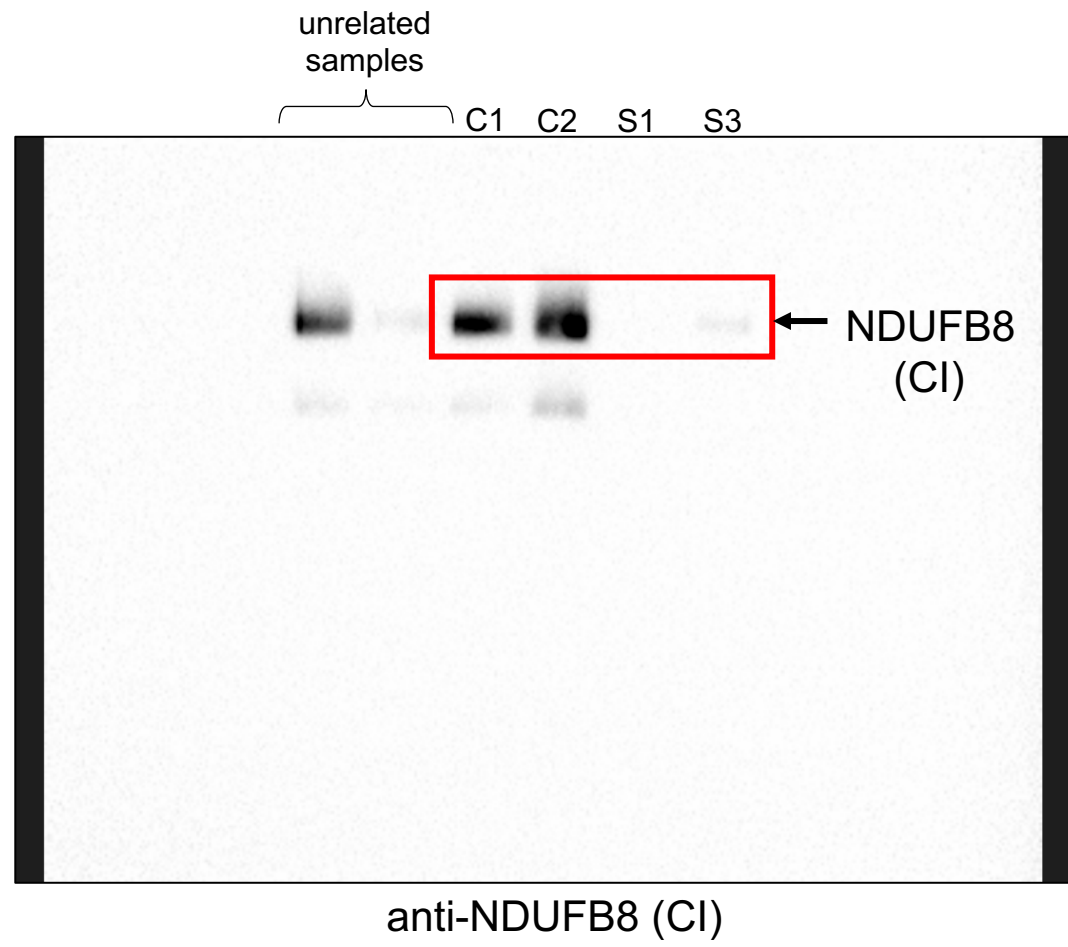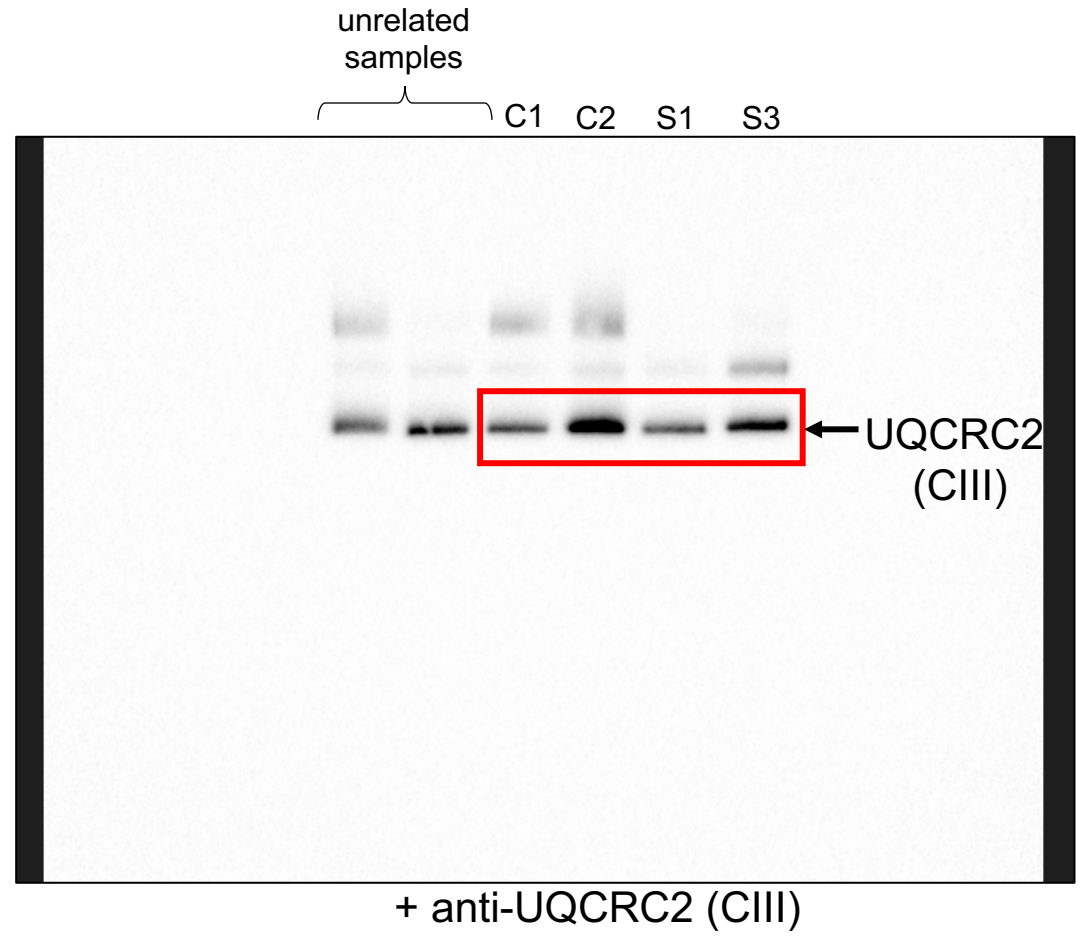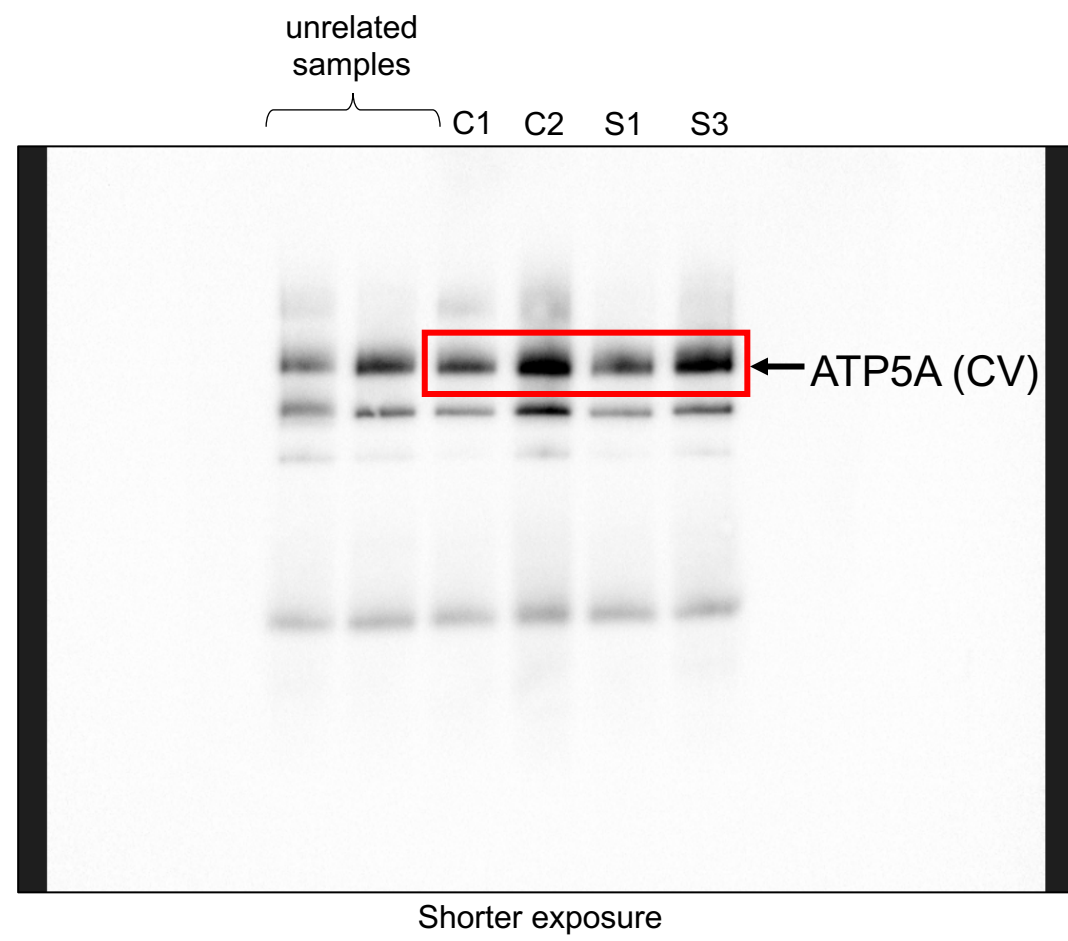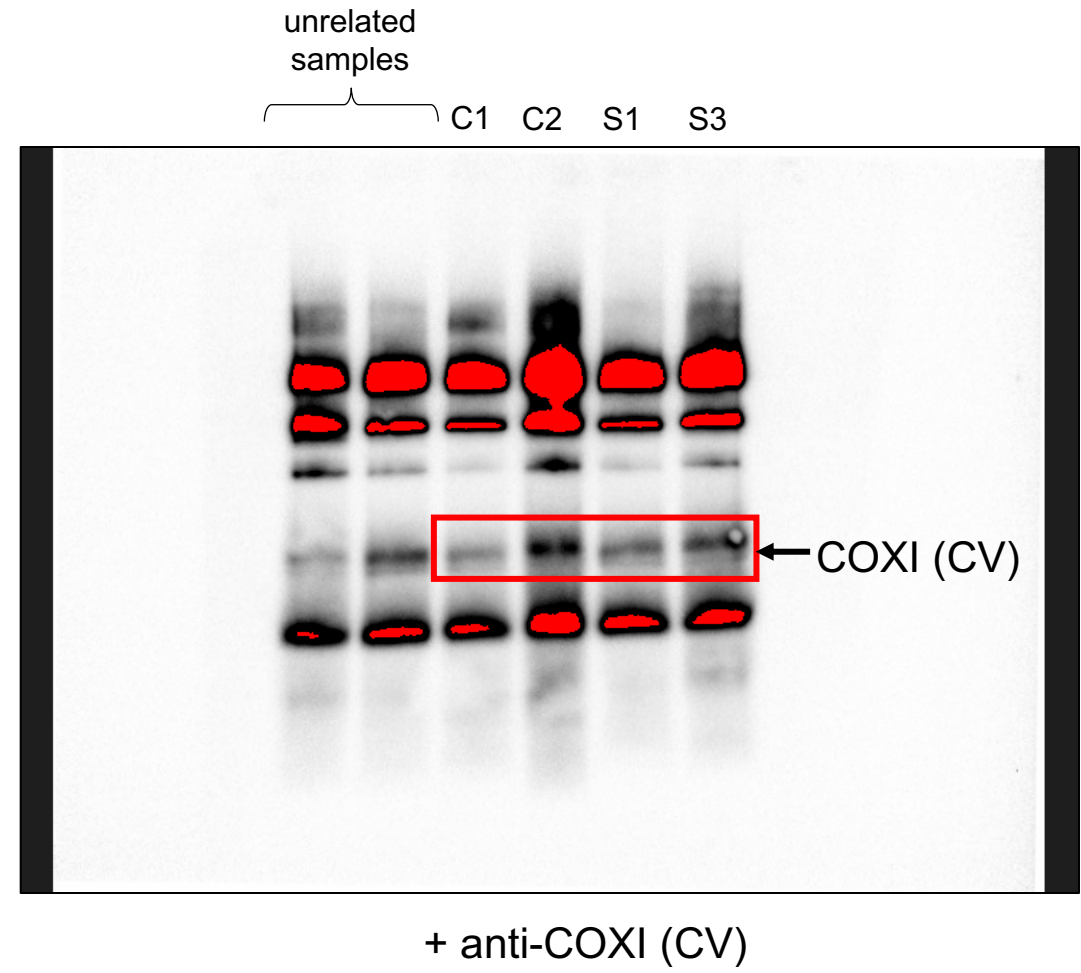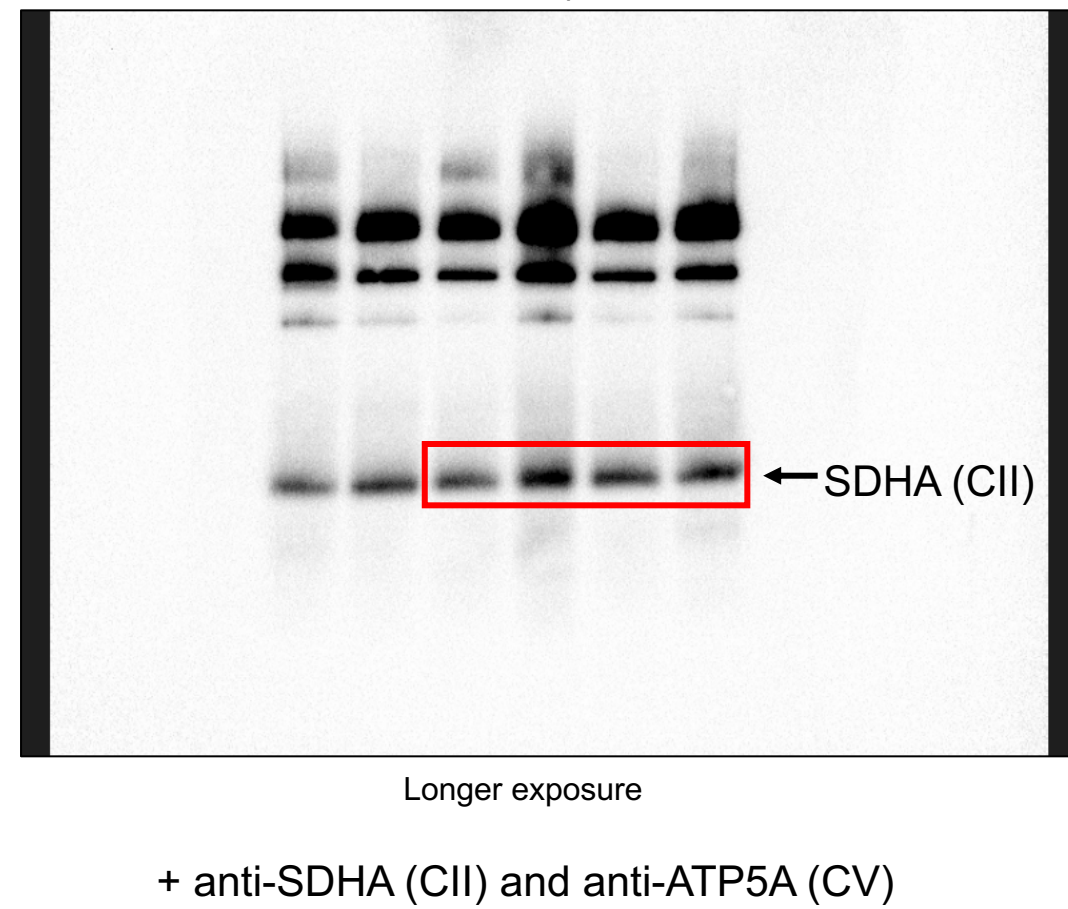



# Figure 3C

## NDUFC2 panel

Chemiluminescent signal used in figure

Colourimetric image to show MW marker (kDa)

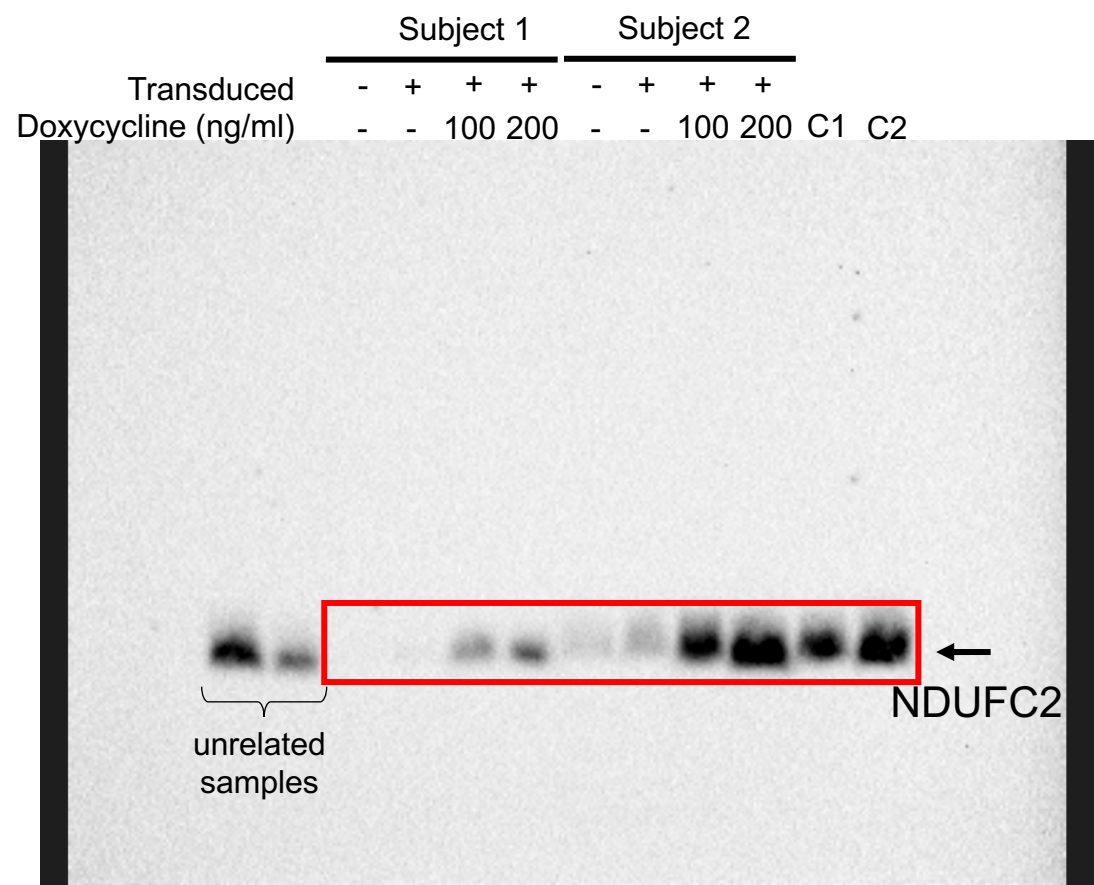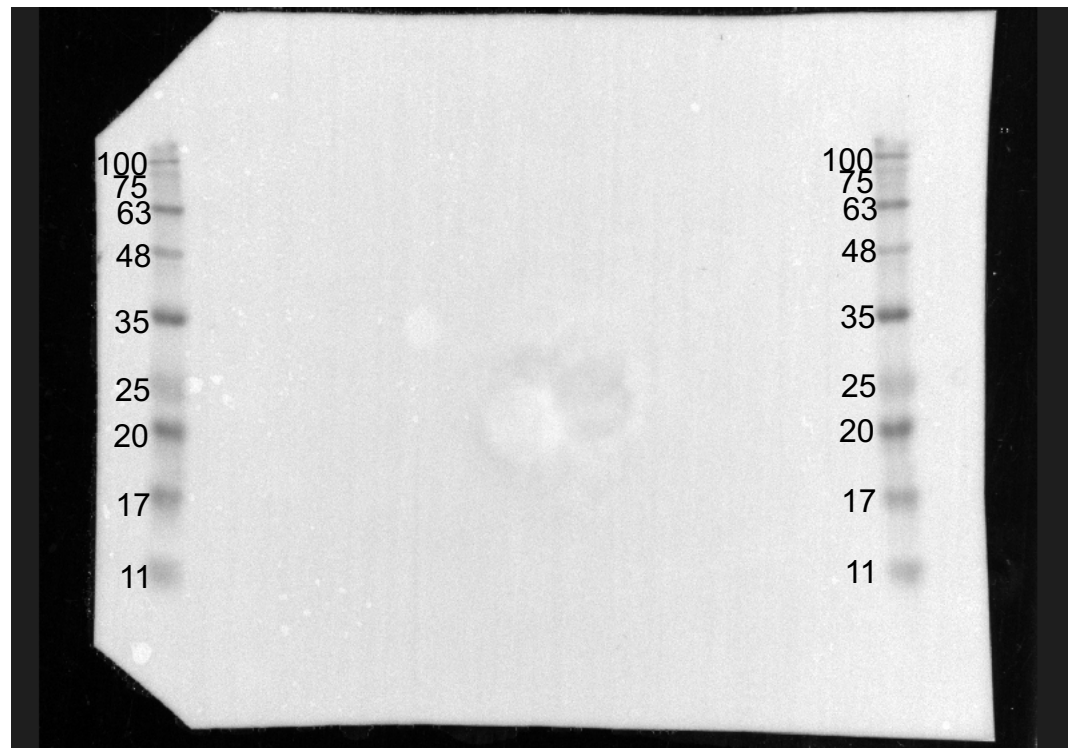

Merged image

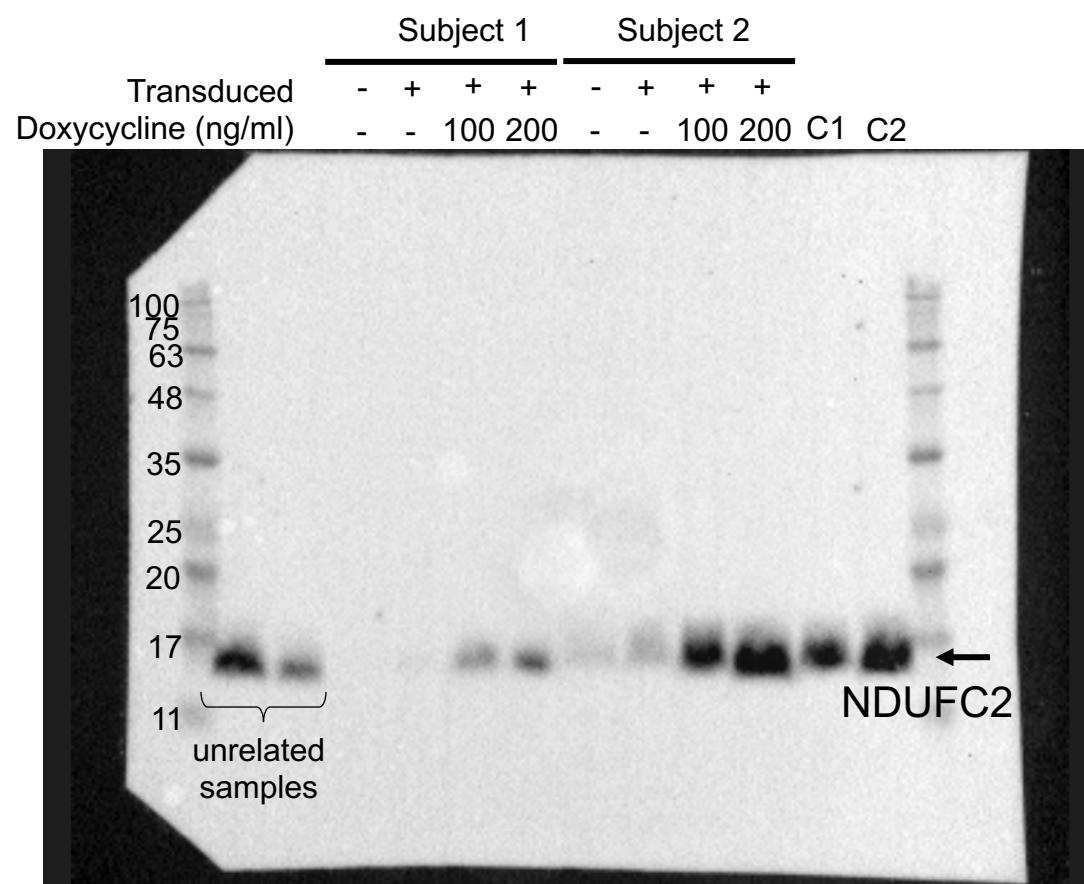

# Figure 3C continued

## NDUFB8 and NDUFA9 panels

Chemiluminescent signal used in figure

Colourimetric image to show MW marker (kDa)

|                     | Subject 1 |   |     |     | Subject 2 |   |     |     |    |    |
|---------------------|-----------|---|-----|-----|-----------|---|-----|-----|----|----|
| Transduced          | -         | + | +   | +   | -         | + | +   | +   | C1 | C2 |
| Doxycycline (ng/ml) | -         | - | 100 | 200 | -         | - | 100 | 200 |    |    |

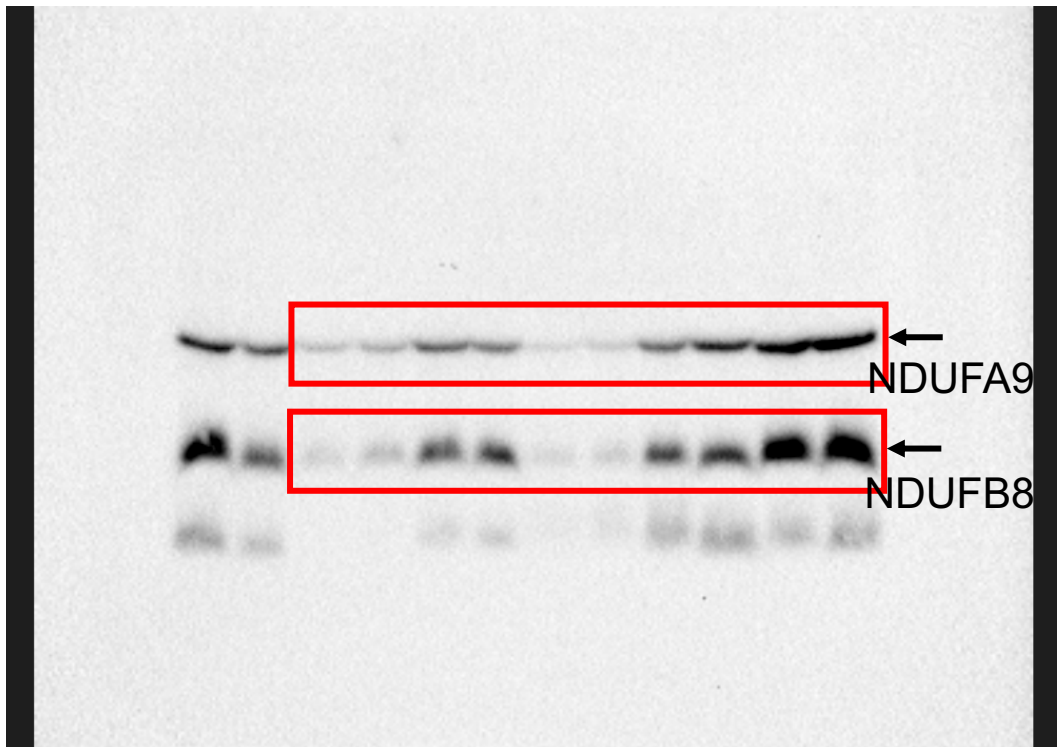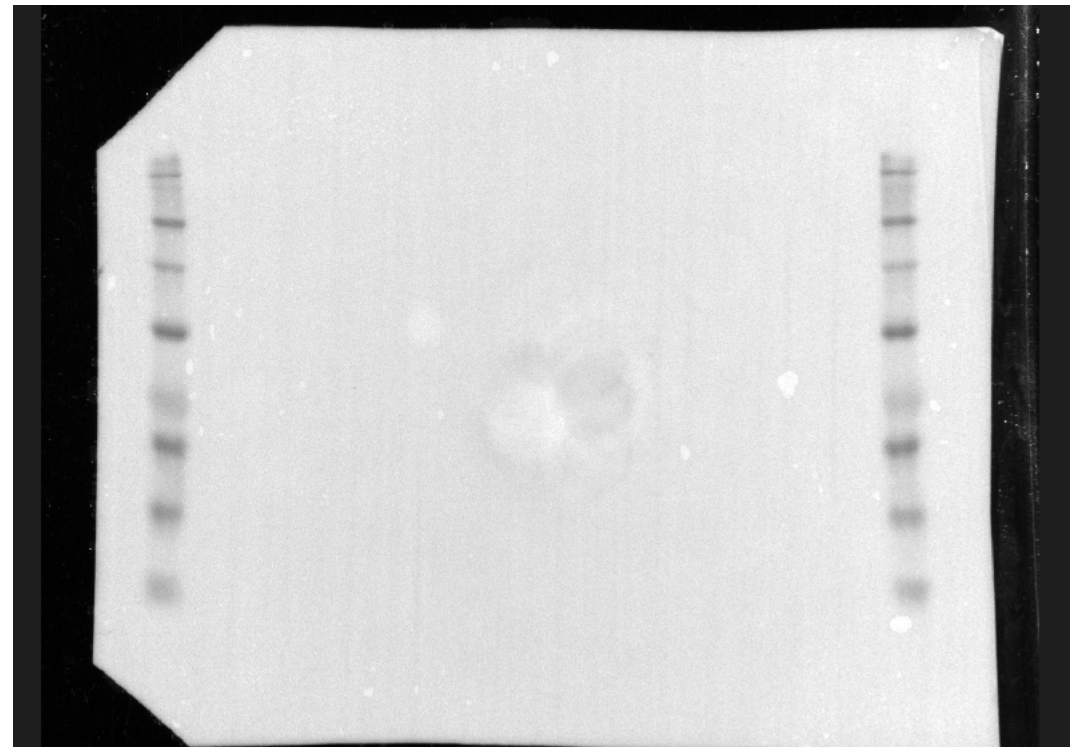

Merged image

|                     | Subject 1 |   |     |     | Subject 2 |   |     |     |    |    |
|---------------------|-----------|---|-----|-----|-----------|---|-----|-----|----|----|
| Transduced          | -         | + | +   | +   | -         | + | +   | +   | C1 | C2 |
| Doxycycline (ng/ml) | -         | - | 100 | 200 | -         | - | 100 | 200 |    |    |

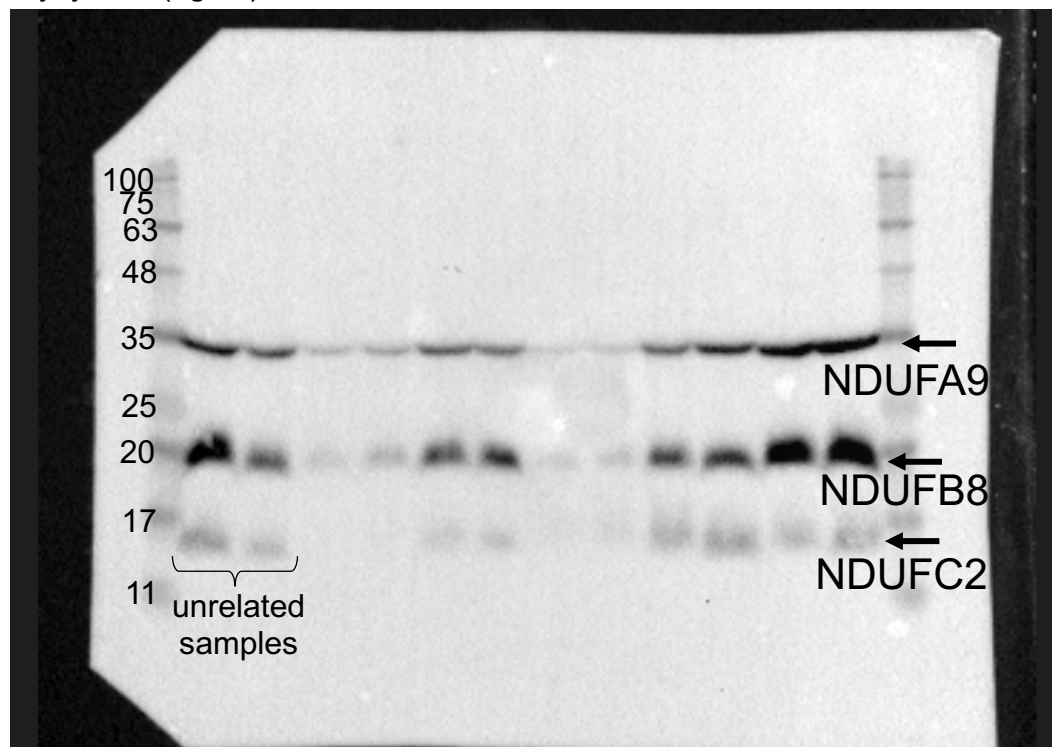



# Figure 3C continued

## NDUFV1 panel

Chemiluminescent signal used in figure

Colourimetric image to show MW marker (kDa)

|                     | Subject 1 |   |     |     | Subject 2 |   |     |     |    |    |
|---------------------|-----------|---|-----|-----|-----------|---|-----|-----|----|----|
| Transduced          | -         | + | +   | +   | -         | + | +   | +   | C1 | C2 |
| Doxycycline (ng/ml) | -         | - | 100 | 200 | -         | - | 100 | 200 |    |    |

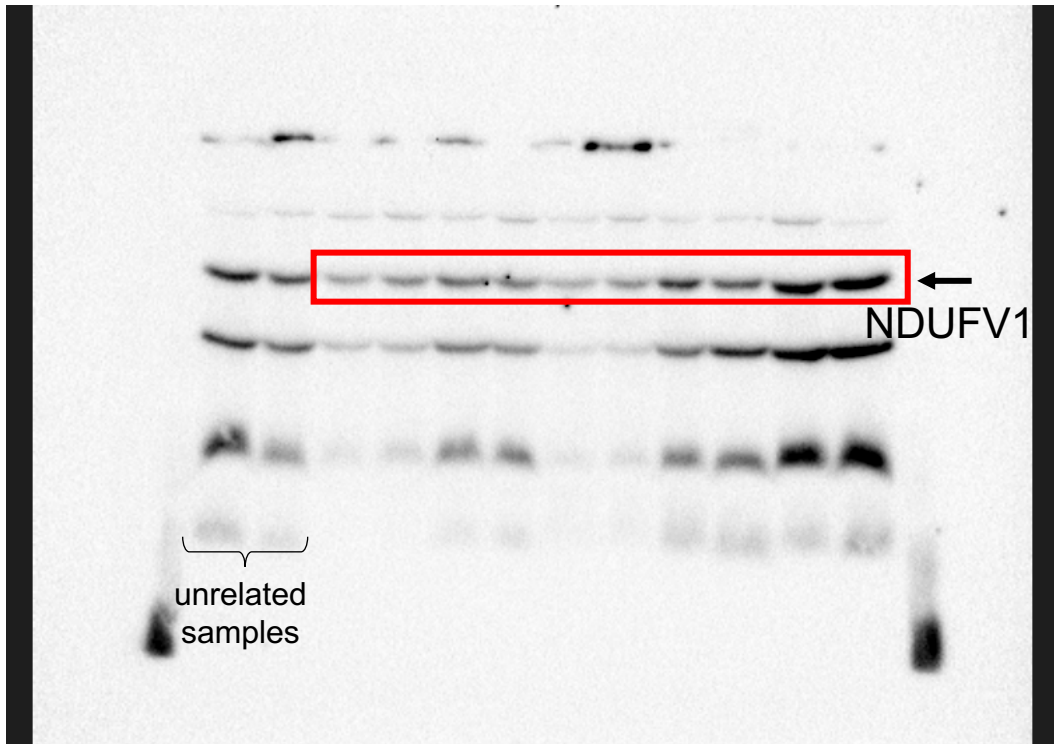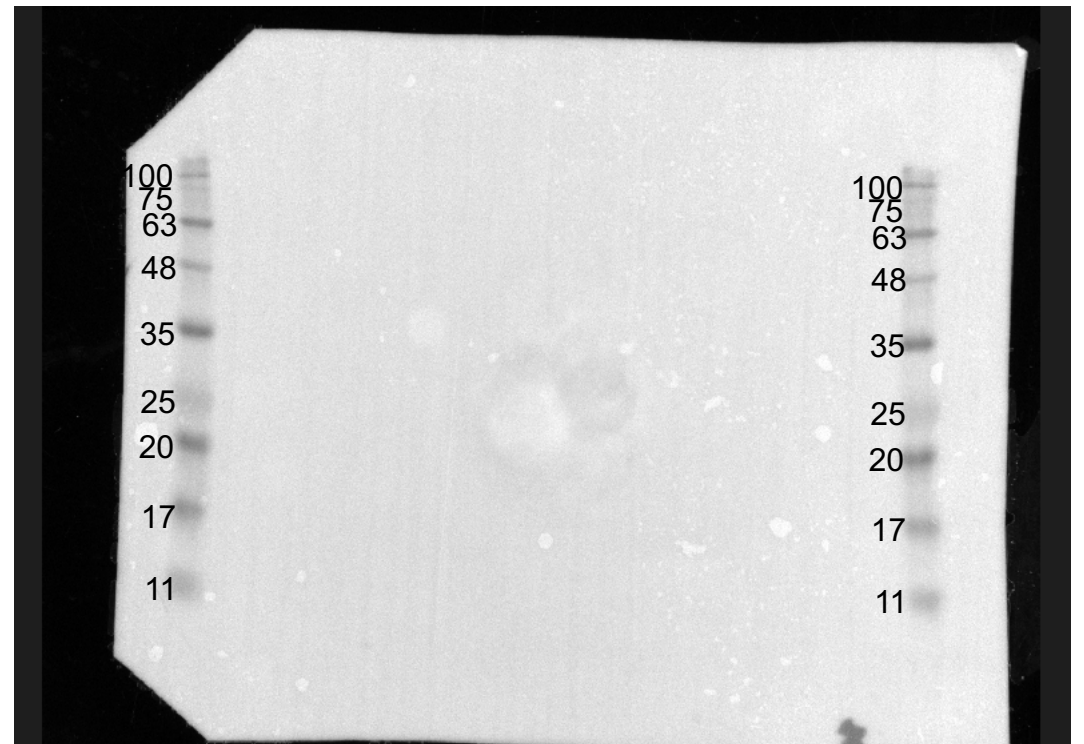

Merged image

|                     | Subject 1 |   |     |     | Subject 2 |   |     |     |    |    |
|---------------------|-----------|---|-----|-----|-----------|---|-----|-----|----|----|
| Transduced          | -         | + | +   | +   | -         | + | +   | +   | C1 | C2 |
| Doxycycline (ng/ml) | -         | - | 100 | 200 | -         | - | 100 | 200 |    |    |

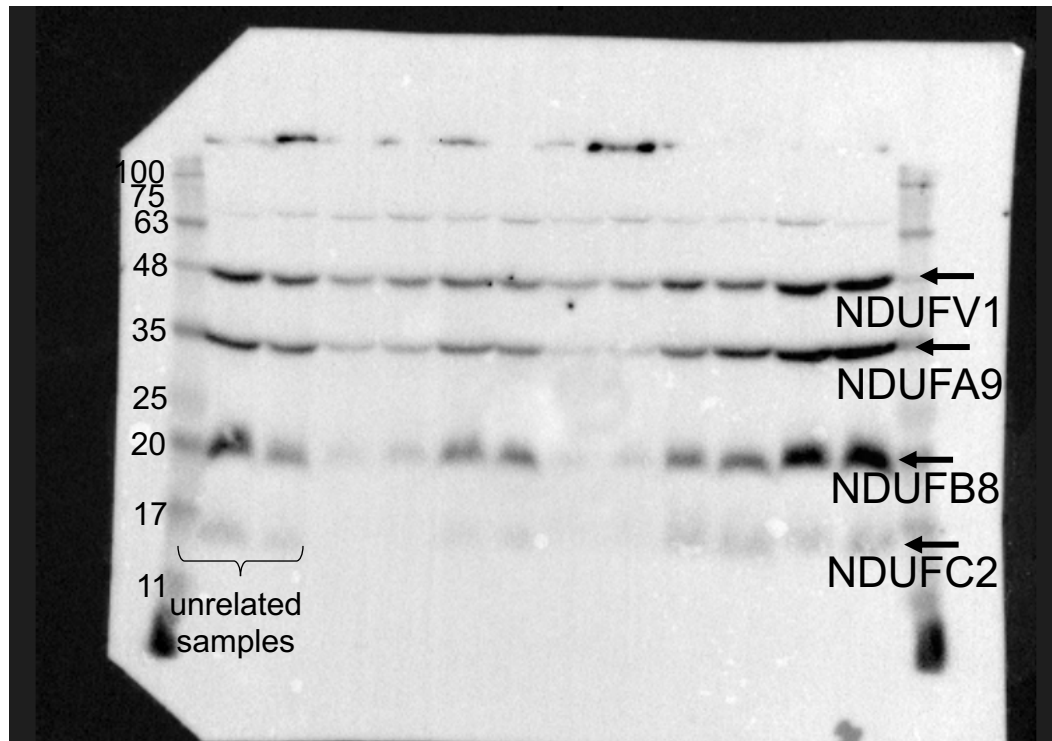

# Figure 3C

## SDHA panel

Chemiluminescent signal used in figure

Colourimetric image to show MW marker (kDa)

|                     | Subject 1 |   |     |     | Subject 2 |   |     |     |    |    |
|---------------------|-----------|---|-----|-----|-----------|---|-----|-----|----|----|
| Transduced          | -         | + | +   | +   | -         | + | +   | +   | C1 | C2 |
| Doxycycline (ng/ml) | -         | - | 100 | 200 | -         | - | 100 | 200 |    |    |

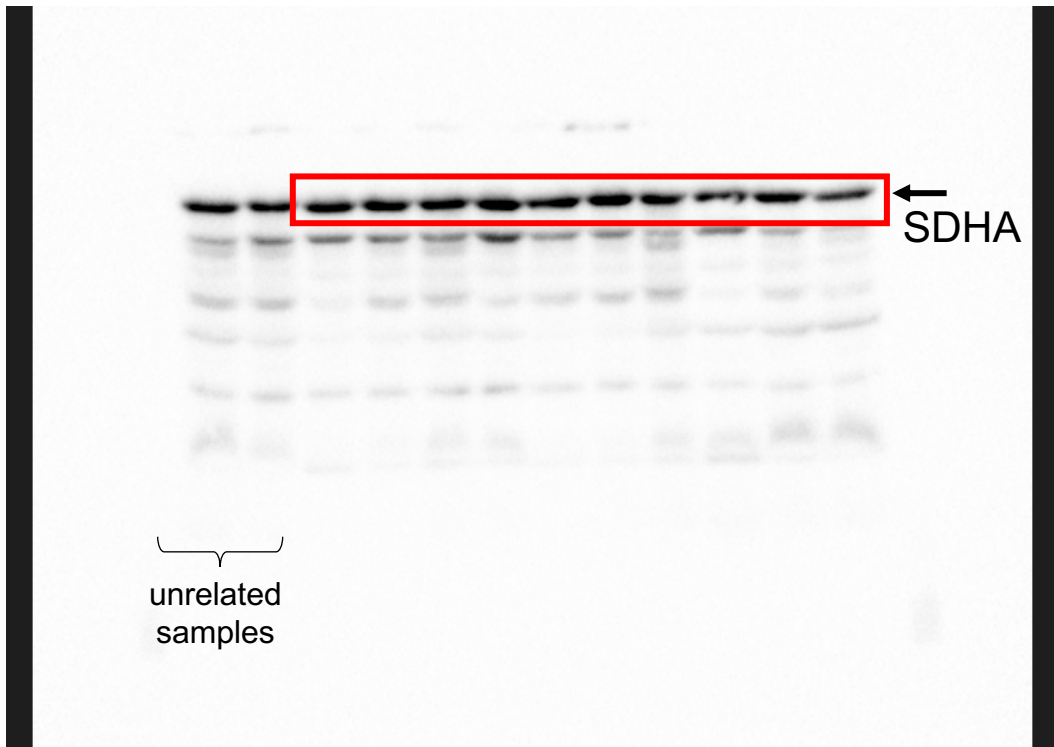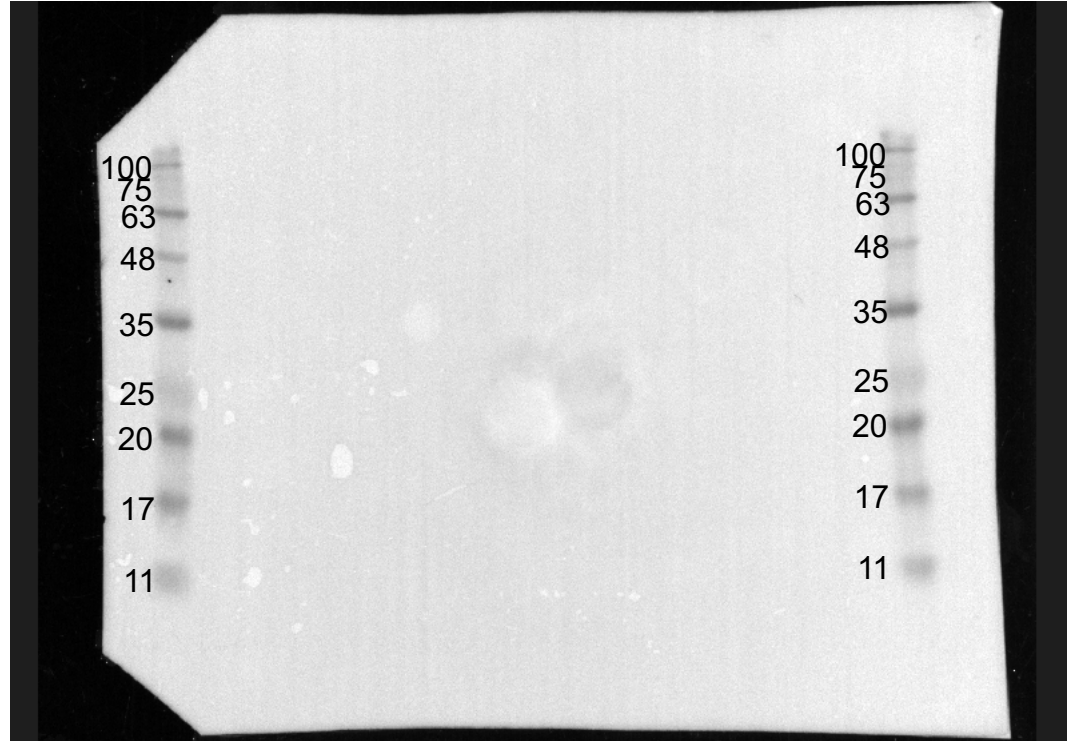

Merged image

|                     | Subject 1 |   |     |     | Subject 2 |   |     |     |    |    |
|---------------------|-----------|---|-----|-----|-----------|---|-----|-----|----|----|
| Transduced          | -         | + | +   | +   | -         | + | +   | +   | C1 | C2 |
| Doxycycline (ng/ml) | -         | - | 100 | 200 | -         | - | 100 | 200 |    |    |

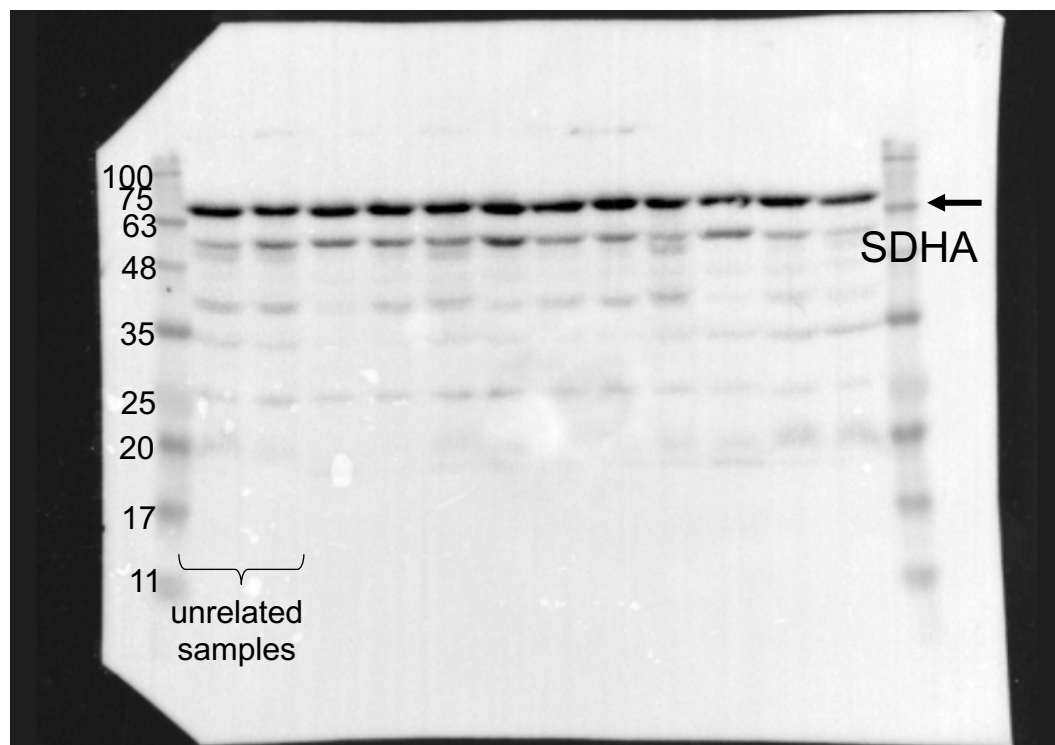



# Figure 3D

## Subject 1 panel

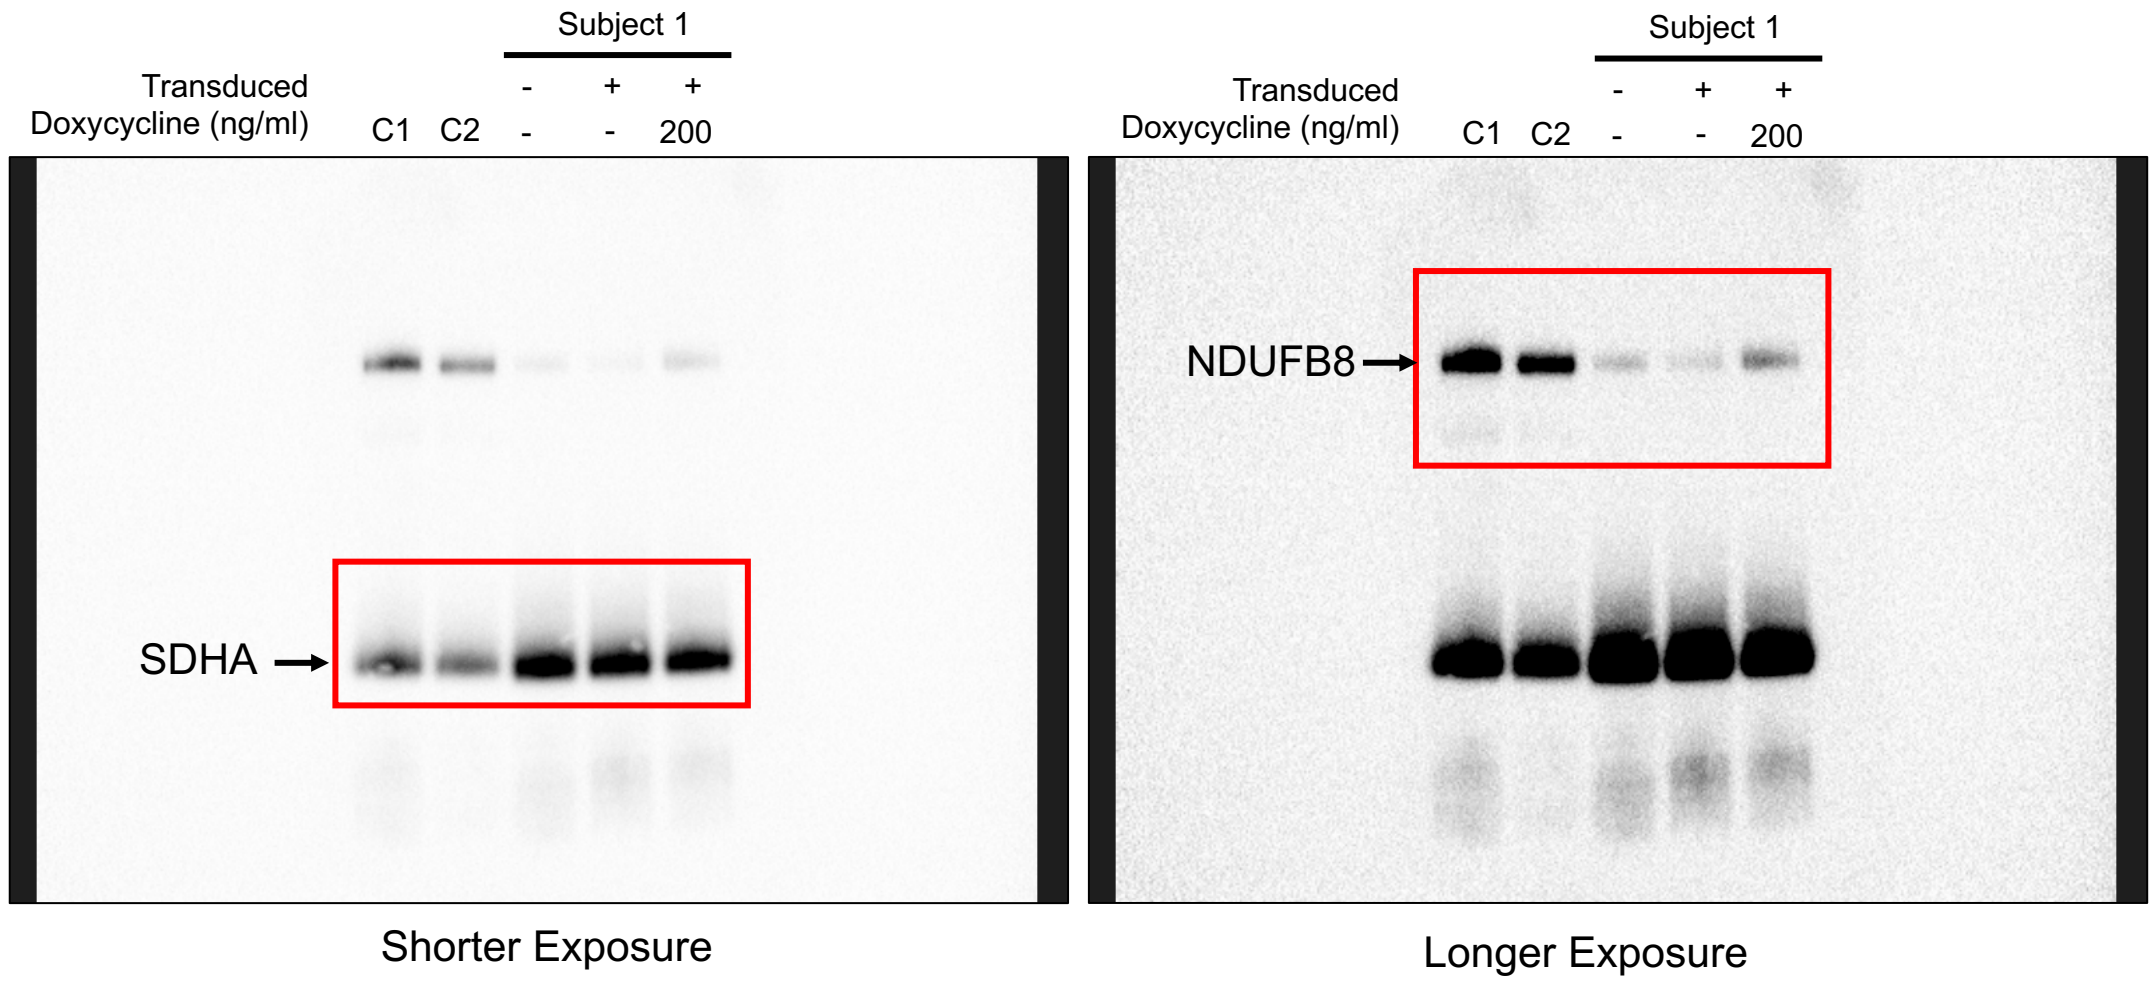

## Subject 2 panel

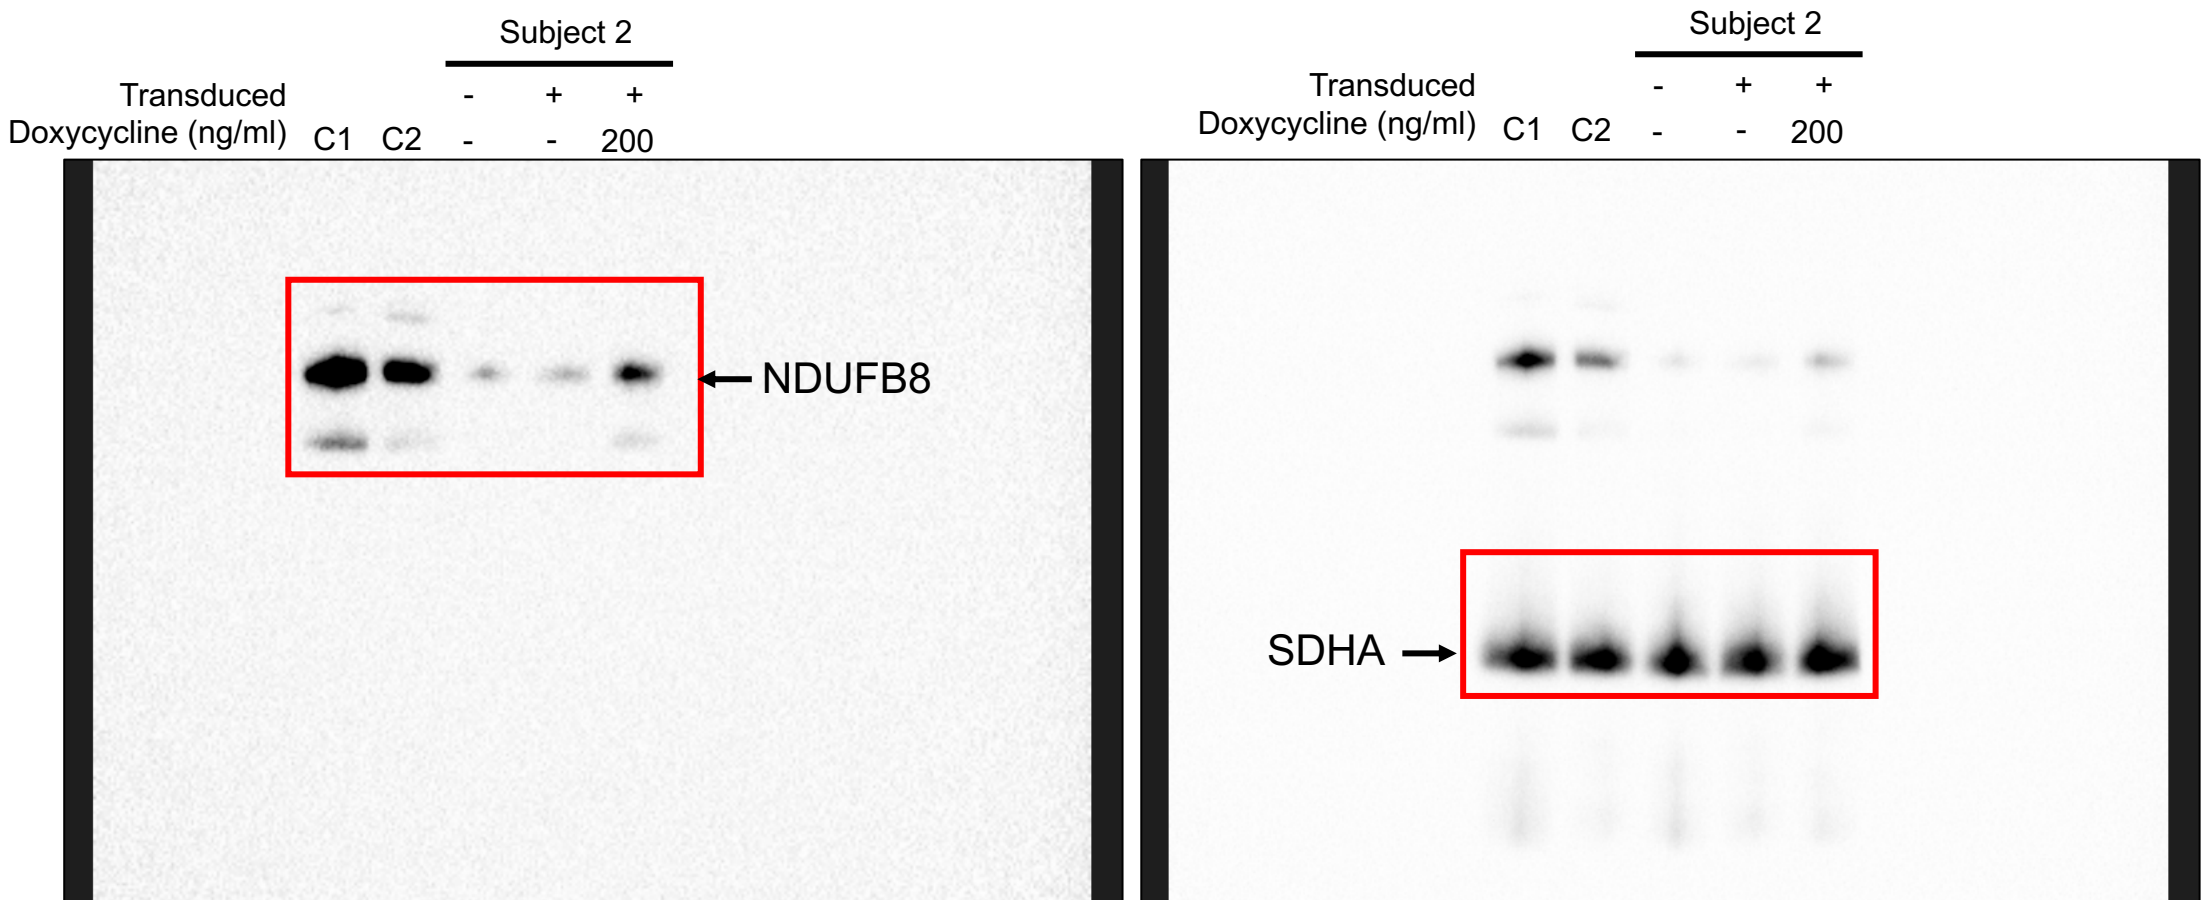

Supplement: EMMM-12-e12619-s002.pdf [file EMMM-12-e12619-s002.pdf]
